# Supplementary material
Source: Springer Nature journal article supplement (https://www.springermedizin.de/resource/supplementary/12936_2013_2826_MOESM2_ESM.pdf/9544382)
Supplement: MOESM2 [file 9544382]

Distance weighted  
infection prevalence (%)

A

Mean household infection  
density (parasites/ $\mu$ l)

B

- 0
- 0 - 29
- 30 - 34
- 35 - 45
- >45

- No infection
- <100
- 100 - 2,500
- 2,500 - 15,000
- >15,000

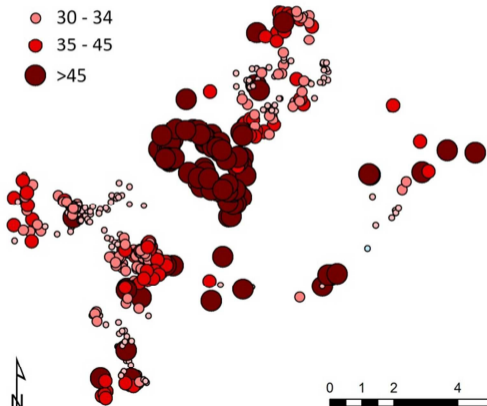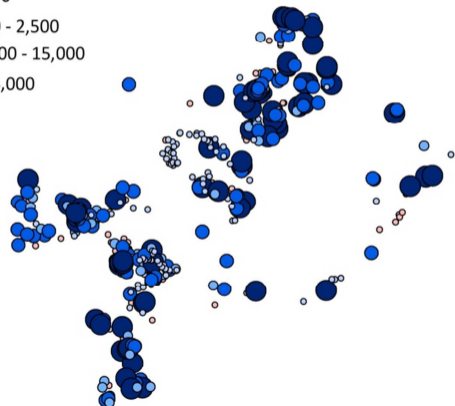

0 1 2 4 6 8 Kilometers
